# Supplementary material for: Suboptimal glycemic control among subjects with diabetes mellitus in India: a subset analysis of cross-sectional wave-7 (2016) data from the International Diabetes Management Practices Study (IDMPS)
Source: PubMed Central journal article supplement — Ther Adv Endocrinol Metab. 2020 Jun 27;11:2042018820937217. doi: 10.1177/2042018820937217 (PMC7325532; doi:10.1177/2042018820937217), 2020-06-27
Supplement: sj-pdf-1-tae-10.1177_2042018820937217.pdf [file sj-pdf-1-tae-10.1177_2042018820937217.pdf]

**Supplementary Table 1: Ethics committee approvals**

| <b>EC Name</b>                                                                                          | <b>Date of Approval</b> | <b>Type of EC</b> | <b>Investigator approved</b> |
|---------------------------------------------------------------------------------------------------------|-------------------------|-------------------|------------------------------|
| Supe Hospital Ethics committee - Nasik                                                                  | 15-Feb-16               | Institutional     | 1                            |
| Yalamanchi Hospital Yalamanchi Hospital and Research Centre Pvt Ltd - Vijaywada                         | 20-Feb-16               | Institutional     | 1                            |
| IECCS of Apollo Hospital Office of Institutional Ethics Committee Bannerghatta Road Bangalore Karnataka | 2-Mar-16                | Institutional     | 1                            |
| Kovai Diabetes Speciality Centre and Hospital Vivekananda Road Ramnagar Coimbatore - Tamil Nadu         | 7-Mar-16                | Institutional     | 1                            |
| Regional Ethics committee - Coimbatore                                                                  | 14-Mar-16               | Institutional     | 1                            |
| Ethics Committee Jehangir Clinical Development Center - Pune                                            | 29-Mar-16               | Central EC        | 17                           |
| Ethics Committee Jehangir Clinical Development Center - Pune                                            | 4-Mar-16                | Central EC        | 19                           |
| Ethics Committee Jehangir Clinical Development Center - Pune                                            | 10-Mar-16               | Central EC        | 7                            |
| Ethics Committee Jehangir Clinical Development Center - Pune                                            | 16-Mar-16               | Central EC        | 7                            |
