# Supplementary material for: Suboptimal glycemic control among subjects with diabetes mellitus in India: a subset analysis of cross-sectional wave-7 (2016) data from the International Diabetes Management Practices Study (IDMPS)
Source: PubMed Central journal article supplement — Ther Adv Endocrinol Metab. 2020 Jun 27;11:2042018820937217. doi: 10.1177/2042018820937217 (PMC7325532; doi:10.1177/2042018820937217), 2020-06-27
Supplement: sj-pdf-2-tae-10.1177_2042018820937217.pdf [file sj-pdf-2-tae-10.1177_2042018820937217.pdf]

Supplementary Table 2: Major classes of drugs used by participants for diabetes treatment

| OGLDs                                          | Type 1<br>N=44 | Type 2          |                         |                | Total<br>N=505 |
|------------------------------------------------|----------------|-----------------|-------------------------|----------------|----------------|
|                                                |                | OGLD<br>N=303   | OGLD + Insulin<br>N=158 | Total<br>N=461 |                |
| <b>Participants receiving class of OGLDs</b>   |                |                 |                         |                |                |
| Participants included                          | 43             | 263             | 144                     | 407            | 450            |
| Participants with missing data                 | 1              | 40              | 14                      | 54             | 55             |
| No OGLD                                        | 31             | 0               | 0                       | 0              | 31             |
| Metformin alone                                | 1              | 31              | 15                      | 46             | 47             |
| Sulphonylureas alone                           | 2              | 5               | 6                       | 11             | 13             |
| Metformin + sulphonylureas                     | 1              | 143             | 55                      | 198            | 199            |
| Other                                          | 8              | 84              | 68                      | 152            | 160            |
| <b>Types of OGLDs used*</b>                    |                |                 |                         |                |                |
| Participants included                          | 8              | 63              | 47                      | 110            | 118            |
| Participants with missing data                 | 0              | 0               | 0                       | 0              | 0              |
| Biguanides                                     | 1              | 31              | 15                      | 46             | 47             |
| Sulphonylureas                                 | 2              | 5               | 6                       | 11             | 13             |
| DPP-IV inhibitors                              | 1              | 4               | 9                       | 13             | 14             |
| Thiazolidinediones                             | 1              | 3               | 1                       | 4              | 5              |
| Alpha-glucosidase inhibitors                   | 3              | 2               | 3                       | 5              | 8              |
| Glinides                                       | 0              | 16              | 10                      | 26             | 26             |
| SGLT-2 inhibitors                              | 0              | 2               | 3                       | 5              | 5              |
| Insulins                                       | Type 1<br>N=44 | Type 2          |                         |                | Total<br>N=229 |
|                                                |                | Insulin<br>N=27 | OGLD + insulin<br>N=158 | Total<br>N=185 |                |
| <b>Participants receiving basal insulin</b>    |                |                 |                         |                |                |
| Participants included                          | 44             | 27              | 157                     | 184            | 229            |
| Participants with missing data                 | 0              | 0               | 1                       | 1              | 1              |
| Yes                                            | 29             | 13              | 94                      | 107            | 136            |
| No                                             | 15             | 14              | 63                      | 77             | 92             |
| Long-acting insulin analog                     | 24             | 3               | 81                      | 84             | 108            |
| Intermediate human insulin                     | 5              | 6               | 12                      | 18             | 23             |
| Biosimilar insulin                             | 0              | 4               | 0                       | 4              | 4              |
| <b>Participants receiving prandial insulin</b> |                |                 |                         |                |                |
| Participants included                          | 44             | 27              | 157                     | 184            | 228            |
| Participants with missing data                 | 0              | 0               | 1                       | 1              | 1              |
| Yes                                            | 27             | 6               | 44                      | 50             | 77             |
| No                                             | 17             | 21              | 113                     | 134            | 151            |
| Short-acting insulin analog                    | 12             | 3               | 20                      | 23             | 35             |
| Rapid-acting human insulin                     | 15             | 3               | 24                      | 27             | 42             |
| Biosimilar insulin                             | 1              | 0               | 0                       | 0              | 1              |
| <b>Participants receiving premixed insulin</b> |                |                 |                         |                |                |

|                                |    |    |     |     |     |
|--------------------------------|----|----|-----|-----|-----|
| Participants included          | 44 | 27 | 157 | 184 | 228 |
| Participants with missing data | 0  | 0  | 1   | 1   | 1   |
| Yes                            | 15 | 12 | 59  | 71  | 86  |
| No                             | 29 | 15 | 98  | 113 | 142 |
| Premixed analog insulin        | 5  | 2  | 20  | 22  | 27  |
| Premixed human insulin         | 10 | 10 | 38  | 48  | 58  |

OGLD, oral glucose lowering drugs; DPP-IV, dipeptidyl peptidase-4; SGLT, sodium glucose transport protein

**Commented [A1]:** Any acronyms and abbreviations should be defined in the footnote under the table, so I have added these for you.
